# Supplementary material for: Transcriptomics Analysis and Candidate Genes Associated With Xinjiang Jujubes in Response to Alternaria Alternata Infection
Source: Research Square preprint supplement (doi:10.21203/rs.3.rs-1206961/v1), 2022-01-11
Supplement: Supplementary file 1 [file 5446c89b77c49c398540fc38.docx]

**Transcriptomics analysis and candidate genes associated with Xinjiang jujubes in response to** ***Alternaria alternata* infection**

Yingying Fan1† , Ruili Zhang2†, Xiaoqin Liu2, Yushan Ma2, Yan Wang1, Fengjuan Liu1, Weizhong He1, Aibo Wu3, Cheng Wang1,4*

*** Correspondence:** wangchengxj321@sina.com

†These authors have contributed equally to this work and share first authorship.

1 Key Laboratory of Agro-products Quality and Safety of Xinjiang, Laboratory of Quality and Safety Risk Assessment for Agro-Products (Urumqi), Institute of Quality Standards & Testing Technology for Agro-Products, Xinjiang Academy of Agricultural Sciences, Urumqi 830091, PR China

2 College of Life Sciences, Tarim University, Alar 843300, China

3 SIBS-UGENT-SJTU Joint Laboratory of Mycotoxin Research, CAS Key Laboratory of Nutrition, Metabolism and Food Safety, Shanghai Institute of Nutrition and Health, University of Chinese Academy of Sciences, Chinese Academy of Sciences, Shanghai 200031, PR China

4 Management of Scientific Research, Xinjiang Academy of Agricultural Sciences, Urumqi 830091, PR China

Table S1 Transcriptome sequencing results

| Sample ID | Number of bases before filtration (bp) | Number of bases after filtration (bp) | Q20 after filtration(%) | Q30 after filtration (%) | Reads ratio after filtration (%) | Ratio of mapped to reference genome (%) | Ratio of mapped to reference genome uniquely(%) |
| --- | --- | --- | --- | --- | --- | --- | --- |
| J_CK_1 | 6141330600 | 5645010600 | 97.87 | 94.38 | 91.91 | 84.44 | 83.98 |
| J_CK_2 | 6083904900 | 5596361100 | 97.96 | 94.64 | 91.98 | 84.49 | 84.85 |
| J_CK_3 | 6286358700 | 5802930300 | 98.00 | 94.69 | 92.30 | 86.70 | 85.25 |
| H_CK_1 | 6671975700 | 6147476700 | 97.83 | 94.47 | 92.13 | 81.68 | 84.06 |
| H_CK_2 | 7420316400 | 6693881700 | 97.29 | 93.44 | 90.21 | 76.95 | 79.50 |
| H_CK_3 | 7085044500 | 6399907500 | 97.14 | 93.16 | 90.32 | 79.17 | 83.92 |
| J_T1_1 | 6692552700 | 6039705600 | 97.43 | 93.62 | 90.24 | 87.17 | 85.56 |
| J_T1_2 | 6060122700 | 5493262200 | 97.39 | 93.60 | 90.64 | 84.52 | 84.81 |
| J_T1_3 | 6201326700 | 5606545500 | 97.30 | 93.35 | 90.40 | 85.03 | 84.90 |
| H_T1_1 | 6257522100 | 5643538200 | 97.24 | 93.31 | 90.18 | 86.67 | 84.72 |
| H_T1_2 | 5858538600 | 5320856100 | 97.15 | 93.17 | 90.82 | 76.30 | 82.81 |
| H_T1_3 | 6784013400 | 6123880800 | 97.19 | 93.22 | 90.26 | 82.60 | 84.37 |
| J_T2_1 | 6440527800 | 5848041000 | 97.15 | 93.21 | 90.8 | 75.57 | 84.18 |
| J_T2_2 | 6382983600 | 5786215200 | 97.41 | 93.53 | 90.65 | 84.80 | 85.14 |
| J_T2_3 | 6130771800 | 5546017500 | 97.47 | 93.63 | 90.46 | 87.50 | 85.52 |
| H_T2_1 | 7326267900 | 6640723200 | 97.20 | 93.29 | 90.64 | 80.97 | 83.75 |
| H_T2_2 | 6088118700 | 5531844600 | 96.88 | 92.63 | 90.86 | 79.47 | 83.55 |
| H_T2_3 | 6346987800 | 5738935800 | 97.16 | 93.15 | 90.41 | 82.80 | 84.24 |
| J_T3_1 | 6123229800 | 5574379500 | 97.28 | 93.35 | 91.03 | 78.72 | 85.61 |
| J_T3_2 | 6415439100 | 5830771800 | 97.32 | 93.43 | 90.88 | 76.60 | 84.07 |
| J_T3_3 | 6305983500 | 5752313100 | 97.36 | 93.47 | 91.21 | 79.54 | 85.36 |
| H_T3_1 | 5976287100 | 5384218800 | 97.14 | 93.19 | 90.09 | 71.09 | 80.66 |
| H_T3_2 | 6160677000 | 5550993000 | 97.28 | 93.24 | 90.10 | 86.19 | 85.10 |
| H_T3_3 | 6440066100 | 5852508600 | 97.03 | 93.00 | 90.87 | 78.21 | 82.86 |
| J_T4_1 | 6910455900 | 6334586100 | 97.45 | 93.63 | 91.66 | 79.07 | 85.09 |
| J_T4_2 | 6070417500 | 5541834600 | 97.37 | 93.46 | 91.29 | 80.08 | 85.09 |
| J_T4_3 | 5894830800 | 5358722700 | 97.60 | 93.89 | 90.90 | 85.50 | 85.65 |
| H_T4_1 | 6737733600 | 6120053400 | 97.14 | 93.21 | 90.83 | 74.40 | 81.36 |
| H_T4_2 | 6623918100 | 6035880000 | 97.17 | 93.00 | 91.12 | 86.45 | 85.56 |
| H_T4_3 | 6512736000 | 5959417500 | 97.44 | 93.55 | 91.50 | 87.53 | 84.54 |

Note: (J, Jun jujube; H, Hui jujube; CK, clear water control group; T, treatment group; TX (X=1, 2, 3, 4), x days after treatment)

Table S2 Primer information

| Name | Gene ID | Primer sequence（F） | Primer sequence（R） |
| --- | --- | --- | --- |
| GMP synthase | 107420223 | GACTCTTCGTCAAGCGGTTCTCTG | CTTCGGTGACACAGCCCCAAC |
| expansin-A1 | 107419239 | GGTGGTGATGCCTCTGGTACAATG | AGGCTGCTGTGTTTGTTCCATACC |
| Glucose-6-phosphate/phosphate translocator 2 | 107420411 | AGCGAAAGCAACTCCTTCTCTTCC | CCAATGGCTGCGAACGGTCTG |
| Amino acid permease | 107406430 | GCAGGTCCTCCAGAGAACAAAGC | GCATAACCAACACAGCCGCAAAG |
| PTR FAMILY 5.4 | 107403855 | CGTGTCGGTGTCGTTGGTTCC | AAACTGGTCCGCCGCAAAGG |
| Sulfate transporter 3.4 | 107405210 | TGGCTTTCACCGCTACCTTCTTTG | AAACCCAACCAGAGTCGCTTTCG |
| Internal reference gene | actin | CACGGTGTCGTTACCAACTG | GGCCTGAATGGAGACGTAGA |


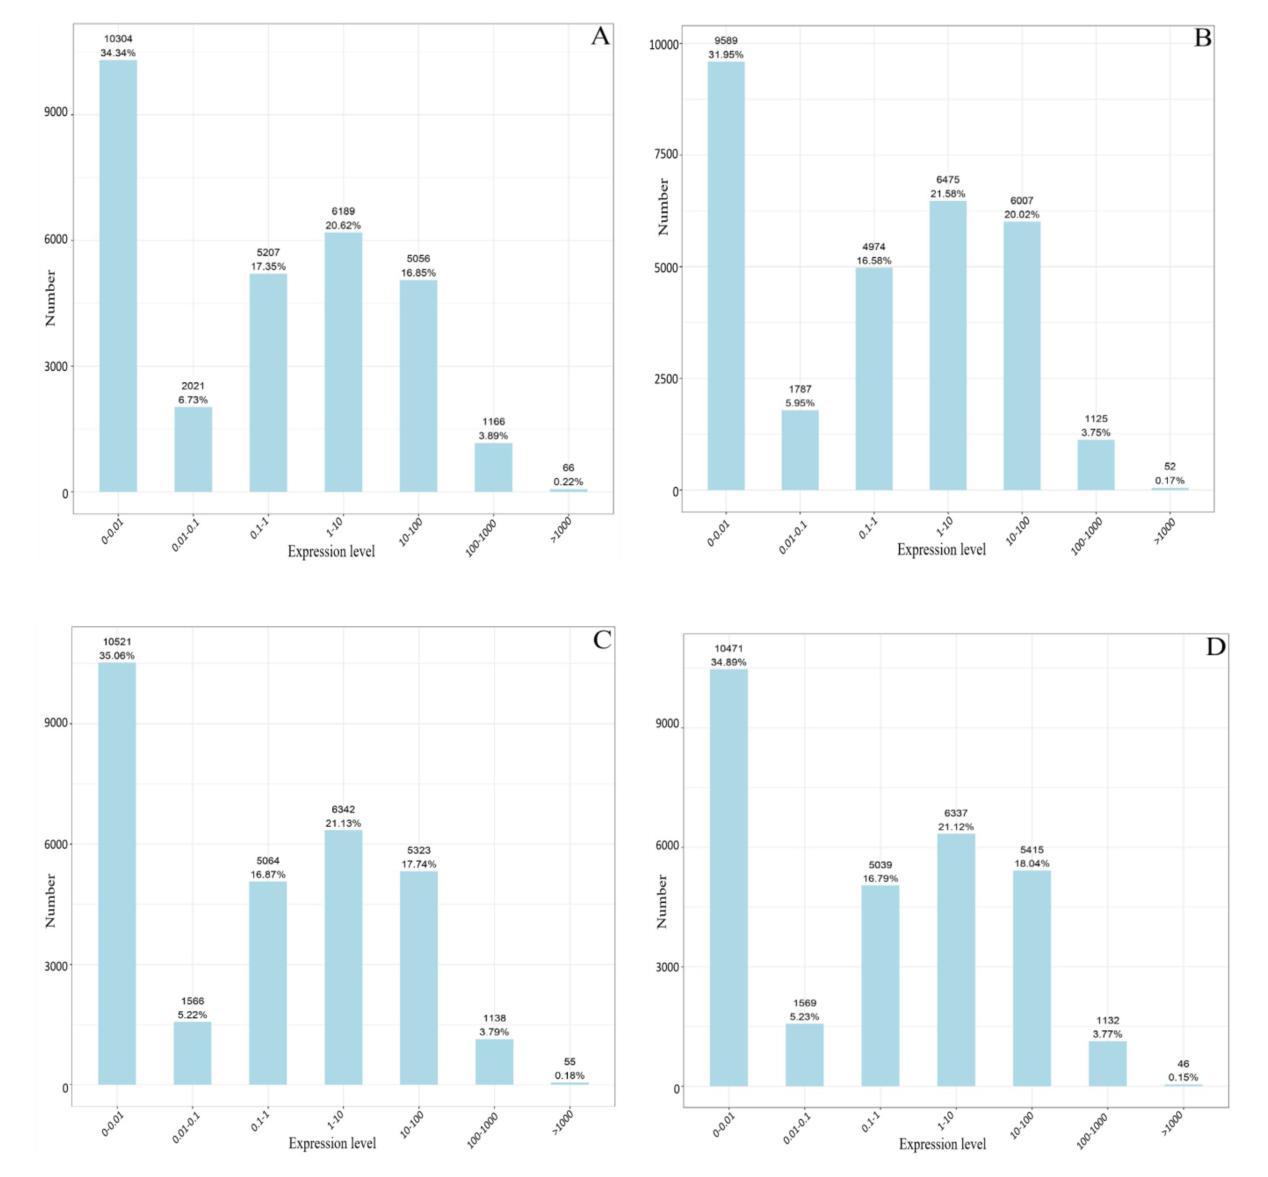


Fig. S1 Distribution of different expression levels in Jun jujube on day 1 (A), 2 (B), 3 (C), and 4 (D)
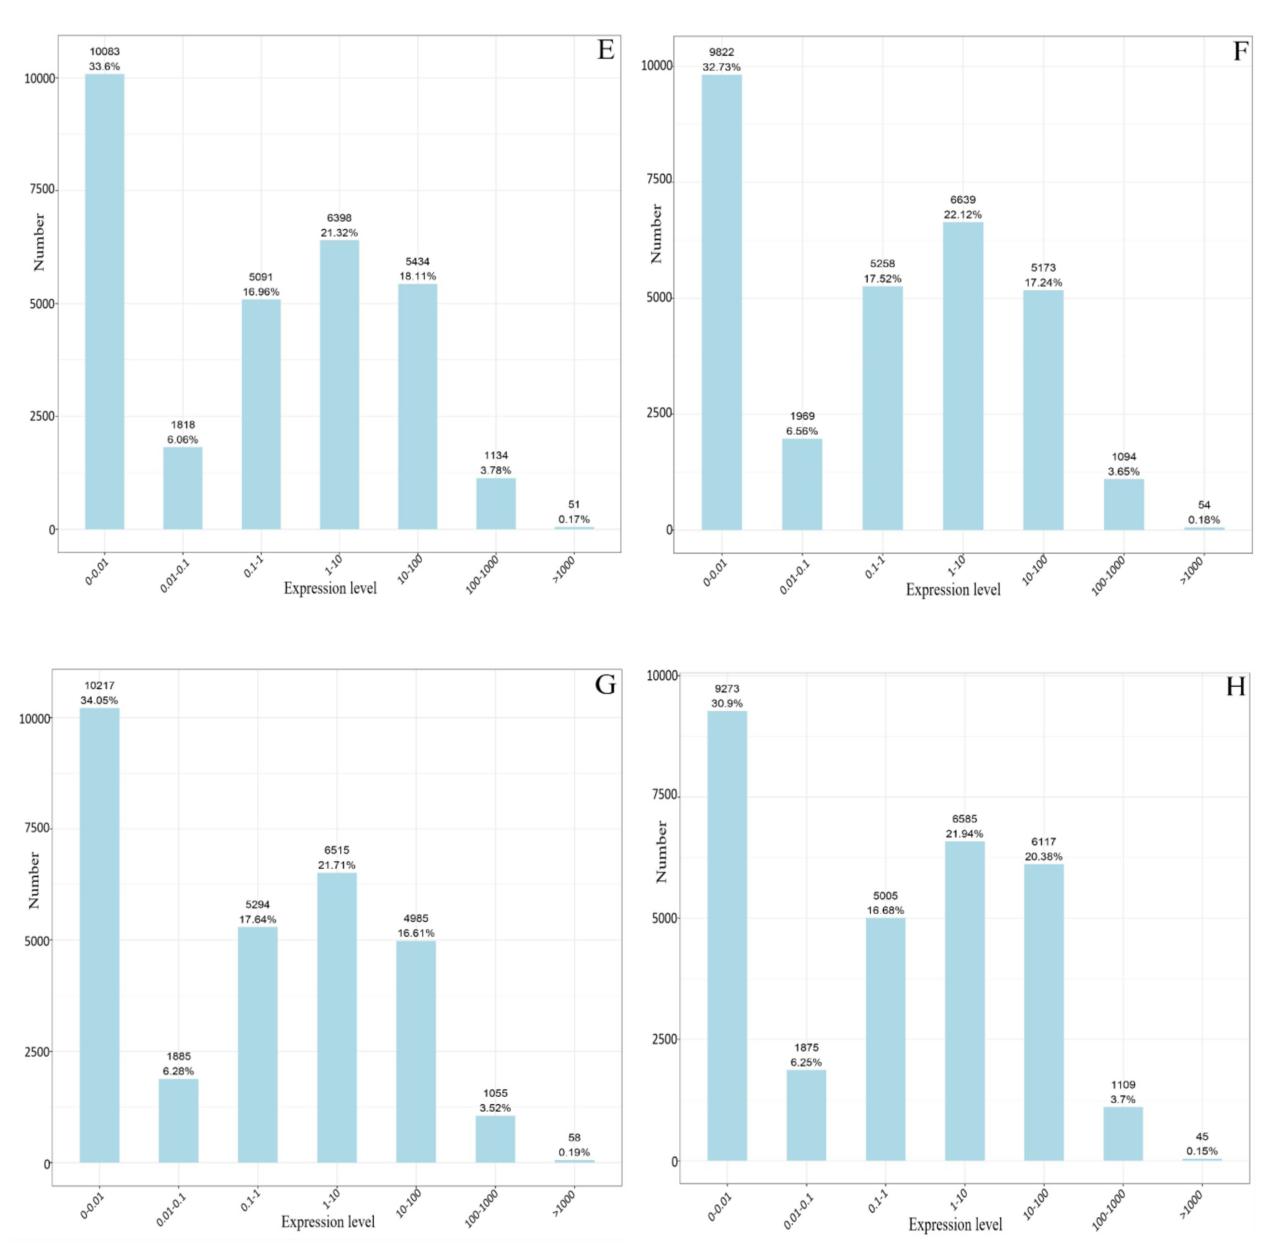


Fig. S2 Distribution of different expression levels in Hui jujube on day 1 (E) , 2 (F) , 3 (G) , and 4(H)


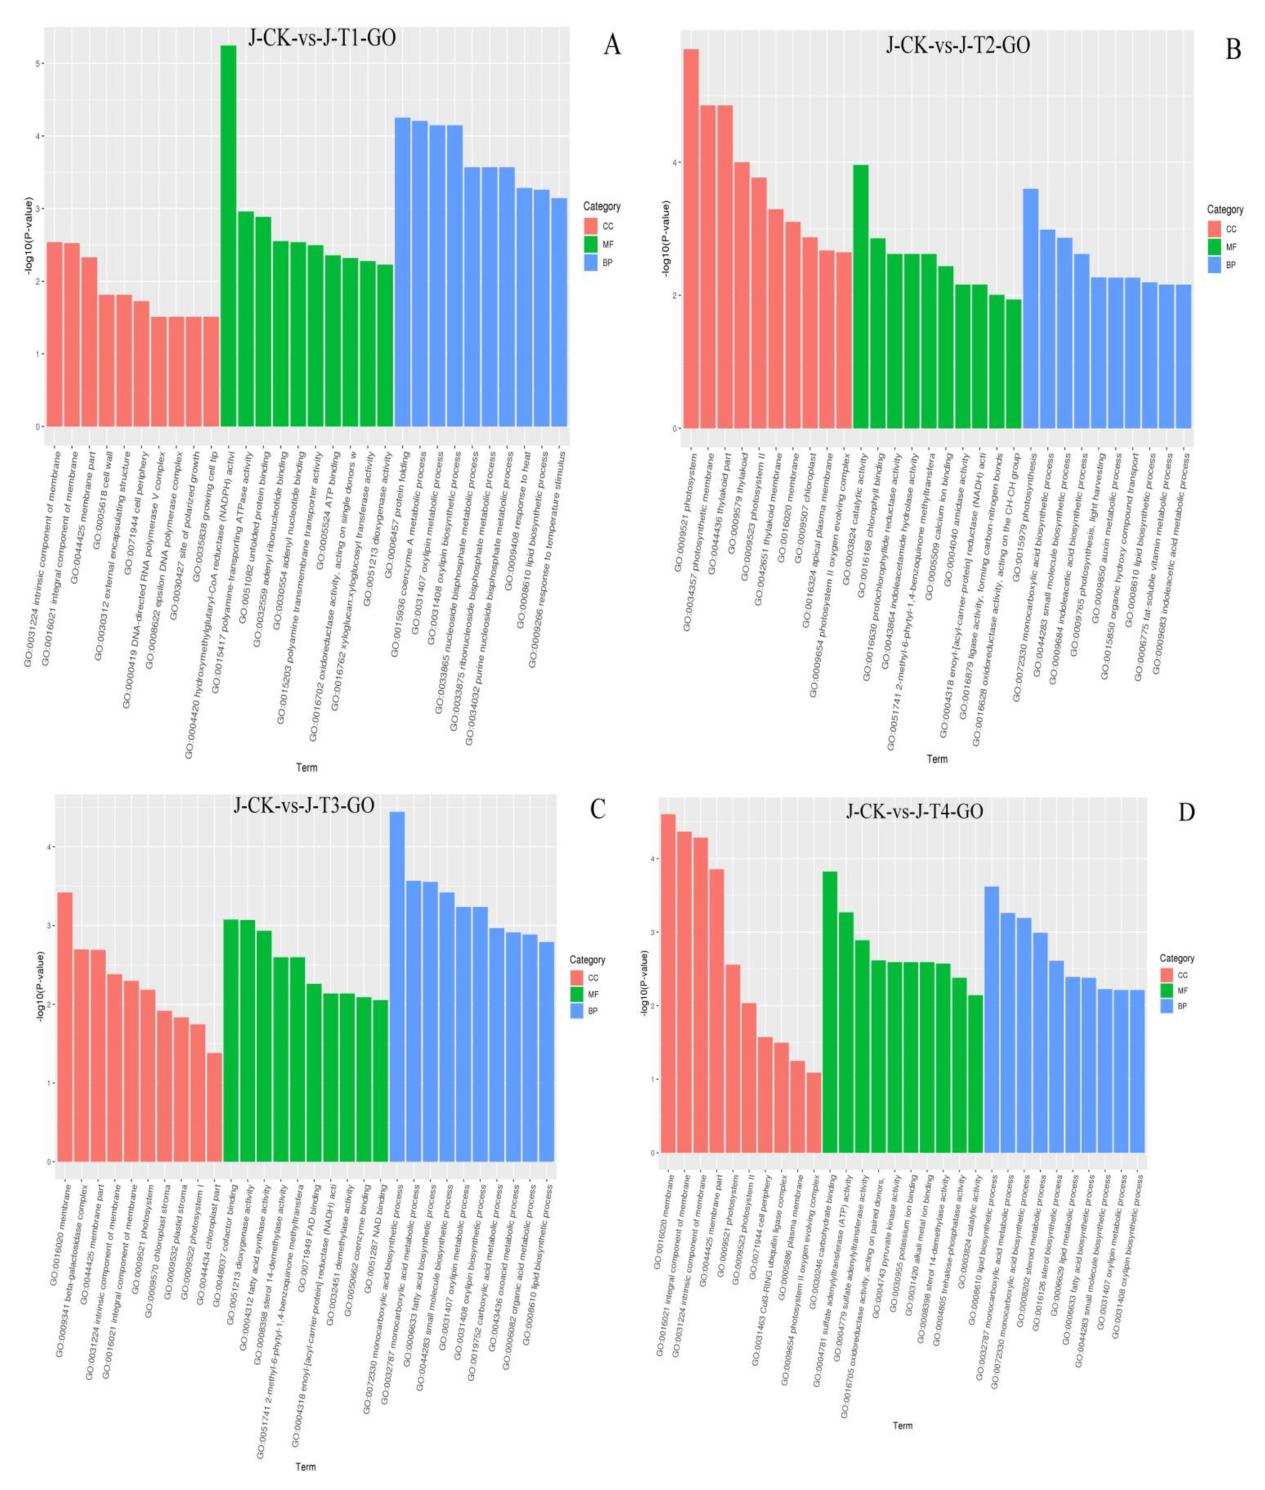


Fig. S3 Statistical map of GO classification of genes with significant differences in Jun jujube (A-D)


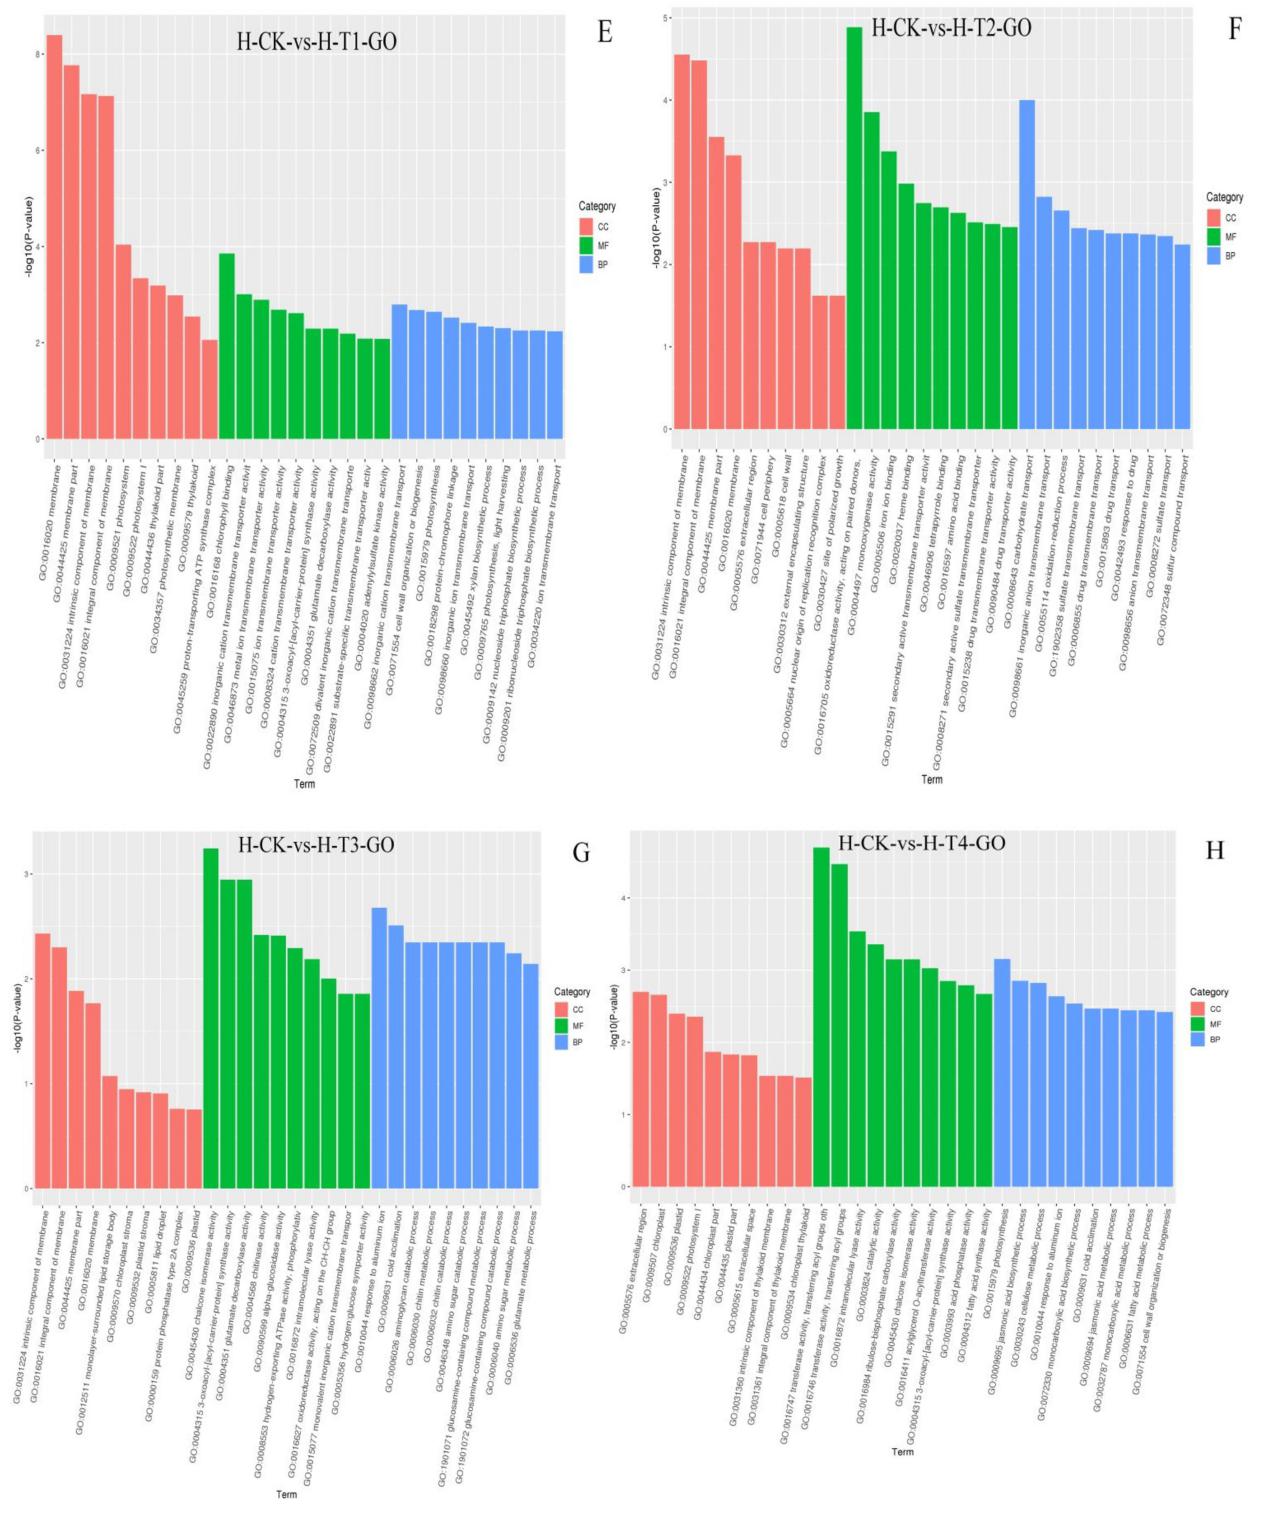


Fig. S4 Statistical map of GO classification of genes with significant differences in Hui jujube (E-H)
